# Supplementary material for: Activation of the Type VI Secretion System in the Squid Symbiont Vibrio fischeri Requires the Transcriptional Regulator TasR and the Structural Proteins TssM and TssA
Source: PubMed Central journal article supplement (PMC8508121; doi:10.1128/jb.00399-21), 2021-10-12
Supplement: jb.00399-21-s0005.pdf [file jb.00399-21-s0005.pdf]

## Supplemental Figure Legends

**Figure S1. Reconstructed transposon mutants are unable to activate T6SS transcriptional reporter.** Qualitative reporter activity for  $P_{hcp}$ -*lacZ* in wild-type ES401 and each transposon mutant reconstructed in an ES401 background. Scale bar is 2 mm. Images taken after 24 h on LBS-X-Gal. Assays were performed at least three times with four biological replicates and a representative experiment is shown.

**Figure S2. The *Vibrio fischeri* ImpA\_N domain protein is distinct from TssA and TagA homologs.** Domain architecture for *V. fischeri* ES401 TssA<sub>VF</sub> and ImpA\_N domain proteins whose T6SS-related functions have been characterized in other species were identified using Hmmer. The GTP-binding motif (T/NKxD) was located by a manual sequence search and is only found in *V. fischeri* TssA<sub>VF</sub> and not found in homologs outside of the *V. fischeri* species. Percent identity to the ES401 protein was calculated by aligning the full-length proteins using Clustal Omega.

**Figure S3. The *V. fischeri* TssM protein contains predicted GTPase domains.** Walker A, Walker B, and GTP-specific binding motifs were identified by searching the ES401 TssM sequence manually. Analogous regions were identified by aligning the full-length sequences of ES401 TssM with closely-related vibrio homologs using Clustal Omega and visualized using Geneious. Black boxes outline motif regions and amino acid letter shading indicates conservation across species (black shading indicates a residue is 100% conserved).

**Figure S4. Co-transcriptional analysis of wild-type ES401 T6SS2 genes.** (A) Graphic representation of *hcp* and *tssI* genes and the primers used for RT-PCR transcriptional analysis in wild-type ES401. The sequences for each primer can be found in Supplemental Table 5. Dashed arrows indicate predicted transcription based on RT-PCR results. Gel image depicting co-transcription of *hcp* and *tssI* in wild-type ES401 using primers P20 and P22. The lane assignments

are as follows (1) wild-type ES401 chromosomal DNA as template; (2) wild-type ES401 RNA as template; (3) wild-type ES401 RNA as template, no reverse transcriptase. (B) Gel image based on RT-PCR results depicting relative abundance of *recA* and *tssI* transcripts in either wild-type ES401 carrying the empty vector (vec), a *tssA<sub>VF</sub>* expression vector, a *tssA<sub>VF</sub>-tssM-tasR* expression vector, or the *tssA<sub>VF</sub><sup>-</sup>* mutant as a negative control. RNA was extracted from each strain following a 5 h incubation on LBS agar plates supplemented with 1.0 mM IPTG, and extractions and subsequent transcriptional analysis was performed twice.

**Figure S5. Tn mutants remain non-lethal in high-viscosity media.** CFUs of ES114 at T0 (gray) or following a 12 h (green) coincubation with wild-type (WT) or mutant ES401 strains in a high-viscosity (hydrogel) liquid medium. \*,  $P < 0.0001$  by a 2-way ANOVA followed by a Sidak's multiple comparisons test comparing 12 h CFUs from coincubation with each mutant to coincubation with WT ES401. Experiment was performed 3 times and combined data are shown ( $n = 12$ ).

**Supplemental Table S5.** Strains, Plasmids, Oligos table.

| Strains or plasmids        | Relevant characteristics                                                                                                                                            | Source or Ref.            |
|----------------------------|---------------------------------------------------------------------------------------------------------------------------------------------------------------------|---------------------------|
| <b><i>E. coli</i></b>      |                                                                                                                                                                     |                           |
| DH5 $\alpha$               | F'/endA1 hsdR17 glnV44 thi-1 recA1 gyrA relA1 $\Delta$ (lacIZYA-argF)U169deoR(f80dlacI $\Delta$ (lacZ)M15)                                                          | Hanahan, 1983             |
| DH5 $\alpha$ $\lambda$ pir | $\lambda$ pir derivative of DH5 $\alpha$                                                                                                                            | Dunn et al, 2005          |
| CC118 $\lambda$ pir        | D( <i>ara-leu</i> ) <i>araD</i> <i>Dlac74</i> <i>galE</i> <i>galK</i> <i>phoA20</i> <i>thi-1</i> <i>rpsE</i> <i>rpsB</i> <i>argE</i> (Am) <i>recA</i> $\lambda$ pir | Herrero et al, 1995       |
| <b><i>V. fischeri</i></b>  |                                                                                                                                                                     |                           |
| ES114                      | Wildtype <i>V. fischeri</i> isolated from <i>E. scolopes</i> light organ                                                                                            | Boettcher and Ruby, 1990  |
| PP3                        | Wildtype <i>V. fischeri</i> isolated from Kaneohe Bay water                                                                                                         | Lee and Ruby, 1992        |
| ES213                      | Wildtype <i>V. fischeri</i> isolated from <i>E. scolopes</i> light organ                                                                                            | Boettcher and Ruby, 1990  |
| MB13B2                     | Wildtype <i>V. fischeri</i> isolated from <i>E. scolopes</i> light organ                                                                                            | Wollenberg and Ruby, 2009 |
| H905                       | Wildtype <i>V. fischeri</i> isolated from Kaneohe Bay water                                                                                                         | Lee and Ruby, 1992        |
| FQ-A001                    | Wildtype <i>V. fischeri</i> isolated from <i>E. scolopes</i> light organ                                                                                            | Sun and Miyashiro, 2016   |
| MJ11                       | Wildtype <i>V. fischeri</i> isolated from <i>M. japonicus</i> light organ                                                                                           | Ruby and Nealson, 1976    |
| ES401                      | Wildtype <i>V. fischeri</i> isolated from <i>E. scolopes</i> light organ                                                                                            | Fidiopastis et al, 2002   |
| SS01                       | ES401 with Tn insertion at 257 bp in <i>tssA</i> (Em <sup>R</sup> )                                                                                                 | This study                |
| SS10                       | ES401 with Tn insertion at 257 bp in <i>tssA</i> (Em <sup>R</sup> )                                                                                                 | This study                |
| SS30                       | ES401 with Tn insertion at 391 bp in <i>tssA</i> (Em <sup>R</sup> )                                                                                                 | This study                |
| SS32                       | ES401 with Tn insertion at 782 bp in <i>tssA</i> (Em <sup>R</sup> )                                                                                                 | This study                |
| SS12                       | ES401 with Tn insertion at 722 bp in <i>tssM_2</i> (Em <sup>R</sup> )                                                                                               | This study                |
| SS14                       | ES401 with Tn insertion at 1675 bp in <i>tssM_2</i> (Em <sup>R</sup> )                                                                                              | This study                |
| SS06                       | ES401 with Tn insertion at 437 bp in <i>tasA</i> (Em <sup>R</sup> )                                                                                                 | This study                |
| SS35                       | Reconstructed ES401 with <i>tssA</i> ::Tn from SS01 (Em <sup>R</sup> )                                                                                              | This study                |
| SS33                       | Reconstructed ES401 with <i>tssA</i> ::Tn from SS10 (Em <sup>R</sup> )                                                                                              | This study                |
| SS39                       | Reconstructed ES401 with <i>tssA</i> ::Tn from SS32 (Em <sup>R</sup> )                                                                                              | This study                |
| SS34                       | Reconstructed ES401 with <i>tssM_2</i> ::Tn from SS14 (Em <sup>R</sup> )                                                                                            | This study                |
| SS38                       | Reconstructed ES401 with <i>tssA</i> ::Tn from SS30 (Em <sup>R</sup> )                                                                                              | This study                |
| SS37                       | Reconstructed ES401 with <i>tssM_2</i> ::Tn from SS12 (Em <sup>R</sup> )                                                                                            | This study                |
| SS51                       | Reconstructed ES401 with <i>tasR</i> ::Tn from SS06 (Em <sup>R</sup> )                                                                                              | This study                |
| ANS2100                    | ES401 with <i>tssF_2</i> disruption (Em <sup>R</sup> )                                                                                                              | Speare et al, 2020        |
| <b>Plasmids</b>            |                                                                                                                                                                     |                           |
| pAKD701                    | Promoterless <i>lacZ</i> -based reporter plasmid; <i>lacZ</i> , <i>oriV<sub>R6KY</sub></i> , <i>oriT</i> , Kn <sup>R</sup>                                          | Dunn et al, 2006          |
| pAG01                      | <i>lacZ</i> -based T6SS reporter; <i>P<sub>hcp</sub>-lacZ</i> , <i>oriV<sub>R6KY</sub></i> , <i>oriT</i> , Kn <sup>R</sup>                                          | Speare et al, 2020        |
| pJLB207                    | Consensus promoter driving <i>lacZ</i> , <i>P<sub>con</sub>-lacZ</i> , <i>oriV<sub>R6KY</sub></i> , <i>oriT</i> , Kn <sup>R</sup>                                   | Bose et al, 2011          |
| pEVS170                    | Mini-Tn5 delivery vector; <i>oriV<sub>R6KY</sub></i> , <i>tnp</i> , <i>oriT</i> , Kn <sup>R</sup> , Em <sup>R</sup>                                                 | Lyell et al, 2008         |

|          |                                                                                                                                                 |                           |
|----------|-------------------------------------------------------------------------------------------------------------------------------------------------|---------------------------|
| pLosTfoX | Plasmid for natural transformations; 995 bp of <i>V. fischeri</i> ES114 DNA containing the <i>tfoX<sup>VF</sup></i> ORF, Cm <sup>R</sup>        | Pollack-Berti et al, 2010 |
| pEVS104  | Conjugative helper, <i>oriV<sub>R6KY</sub></i> , <i>oriT</i> , Kn <sup>R</sup>                                                                  | Stabb and Ruby, 2002      |
| pVSV102  | <i>gfp+</i> , <i>oriV<sub>R6KY</sub></i> , <i>oriV<sub>pES213</sub></i> , <i>oriT</i> , Kn <sup>R</sup>                                         | Dunn et al, 2006          |
| pVSV208  | <i>dsRed+</i> , <i>oriV<sub>R6KY</sub></i> , <i>oriV<sub>pES213</sub></i> , <i>oriT</i> , Cm <sup>R</sup>                                       | Dunn et al, 2006          |
| pAS2028  | <i>gfp</i> -based T6SS reporter; <i>P<sub>hcp</sub>-gfp</i> , <i>oriV<sub>R6KY</sub></i> , <i>oriT</i> , Kn <sup>R</sup>                        | This study                |
| pJLS71   | Promoterless Cm <sup>R</sup> - <i>gfp</i> -based reporter plasmid; <i>mCherry</i> , <i>oriV<sub>R6KY</sub></i> , <i>oriT</i> , Kn <sup>R</sup>  | Stoudenmire et al, 2018   |
| pAKD601  | <i>oriV<sub>R6KY</sub></i> , <i>oriT</i> , <i>lacI<sup>q</sup></i> and IPTG-inducible promoter with optional <i>gfp</i> fusion, Kn <sup>R</sup> | Dunn and Stabb, 2008      |
| pSNS119  | <i>tssB_2-gfp</i> fusion expression vector; <i>oriV<sub>R6KY</sub></i> , <i>oriV<sub>pES213</sub></i> , <i>oriT</i> , Kn <sup>R</sup>           | Speare et al., 2018       |
| pSNS114  | <i>tssA</i> expression vector; <i>oriV<sub>R6KY</sub></i> , <i>oriT</i> , <i>lacI<sup>q</sup></i> , Kn <sup>R</sup>                             | This study                |
| pSNS131  | <i>tssM</i> expression vector; <i>oriV<sub>R6KY</sub></i> , <i>oriT</i> , <i>lacI<sup>q</sup></i> , Kn <sup>R</sup>                             | This study                |
| pSNS143  | <i>tssA-tssM</i> expression vector; <i>oriV<sub>R6KY</sub></i> , <i>oriT</i> , <i>lacI<sup>q</sup></i> , Kn <sup>R</sup>                        | This study                |
| pSNS111  | <i>tasR</i> expression vector; <i>oriV<sub>R6KY</sub></i> , <i>oriT</i> , <i>lacI<sup>q</sup></i> , Kn <sup>R</sup>                             | This study                |
| pSNS126  | <i>tssM-tasR</i> expression vector; <i>oriV<sub>R6KY</sub></i> , <i>oriT</i> , <i>lacI<sup>q</sup></i> , Kn <sup>R</sup>                        | This study                |
| pSNS142  | <i>tssA-tssM-tasR</i> expression vector; <i>oriV<sub>R6KY</sub></i> , <i>oriT</i> , <i>lacI<sup>q</sup></i> , Kn <sup>R</sup>                   | This study                |

---

### Oligonucleotides<sup>a</sup>

|         |                                              |                       |
|---------|----------------------------------------------|-----------------------|
| ARB1    | GGCCACGCGTCGACTAGTACNNNNNNNNNGATAT           | Brennan et al, 2013   |
| 170Int2 | GCAGTTCAACCTGTTGATAGTACG                     | Brennan et al, 2013   |
| ARB2    | GGCCACGCGTCGACTAGTAC                         | Brennan et al, 2013   |
| 170Ext3 | CAAAGCAATTTTGAGTGACACAGG                     | Brennan et al, 2013   |
| M13F    | TGTTAAAACGACGGCCAGT                          | Eton Bioscience       |
| 170EXT  | GCACTGAGAAGCCCTTAGAGCC                       | Miyashiro et al, 2014 |
| AS1109  | CGGGCTTATCGACTGCACGG                         | This study            |
| AS1110  | CCAACATAGTAAGCCAGTAATCG                      | This study            |
| AS1092  | GGATAATAGCATGCCAACTCCAGGATATATCCCAATGGCATCG  | This study            |
| AS1093  | CTCTGGCTAATGATTGAACTAATAACGGTGGTATATCCAGTG   | This study            |
| AS1094  | CACTGGATATACCACCGTTAGTTAGTTTCAATCATTAGCCAGAG | This study            |
| AS1095  | CGATGCCATTGGGATATATCCTGGAGTTGGCATGCTATTATCC  | This study            |
| P01     | CAGTTACAGTAATTCACCTCTCCC                     | This study            |
| P02     | AACAAGATACTACTGGTTTCTTTCC                    | This study            |
| P03     | ACTTTATCTAAAAATGGTCAATGGGC                   | This study            |
| P04     | ATTCGCAATAGACTCTCTACCG                       | This study            |
| P05     | GATATACAGCGCAAATCCCG                         | This study            |
| P06     | TTTTATGCCCGATAACGATTCCG                      | This study            |

|                     |                                                                      |                           |
|---------------------|----------------------------------------------------------------------|---------------------------|
| P15                 | CACTATGGGAACAAAAGCCC                                                 | This study                |
| P16                 | CACAGTTTTCTCAACGGC                                                   | This study                |
| P20                 | ATGCCAACTCCAGCATATATG                                                | This study                |
| P21                 | TTGGTCAAGGTGTTGGAAC                                                  | This study                |
| P22                 | GTCCCGAACTTTCCATTTTTTG                                               | This study                |
| P103                | GTGGATCCGAGCTCGGTACCAGGAGGAAATTAAGCTATATGGT<br>TTATGTGTCACGTTGTC     | This study                |
| P104                | AGTTCTTCTCCTTTGCTAGCTTATGCAGCCTTTCTTGTTAACCC                         | This study                |
| P78                 | GTGGATCCGAGCTCGGTACCAGGAGGAAATAATTATGATTA<br>AATACTTTGGCTAGAACC      | This study                |
| P71                 | AGTTCTTCTCCTTTGCTAGCTTATTTTTTGTATTACTTCTGGTA<br>GCTTAAA              | This study                |
| P117                | GTGGATCCGAGCTCGGTACCAGGAGGAAATTAAGCATGCTAGG<br>TTTAAAGTTTAATATGAATCT | This study                |
| P119                | AGTTCTTCTCCTTTGCTAGCTTATTTTTTGTATTACTTCTGGTA<br>GCTT                 | This study                |
| AS1167              | ATGGTACCCCTATAAAGGCAGGGAACAAC (KpnI)                                 | This study                |
| P27                 | ATTCTAGATTATCGACACACTGGCTGG                                          | This study                |
| P77                 | AGTTCTTCTCCTTTGCTAGCTTATCGACACACTGGCTGG                              | This study                |
| P95                 | GCTAGCAAAGGAGAAGAACTCTT                                              | This study                |
| P96                 | TTATTTTTTGTGATTACTTCTGGTAGCTT                                        | This study                |
| <i>recA</i> inner-F | TGARAARCARTTYGGTAAAGG                                                | Wollenberg et al,<br>2012 |
| <i>recA</i> inner-R | GGAGCRGCATCAGTCTCTGG                                                 | Wollenberg et al,<br>2012 |

---

<sup>a</sup>Restriction sites are underlined

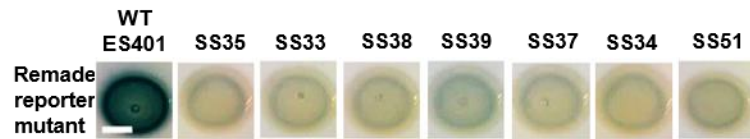

**Figure S1. Reconstructed transposon mutants are unable to activate T6SS transcriptional reporter.** Qualitative reporter activity for  $P_{hcp}$ -*lacZ* in wild-type ES401 and each transposon mutant reconstructed in an ES401 background. Scale bar is 2 mm. Images taken after 24 h on LBS-X-Gal. Assays were performed at least three times with four biological replicates and a representative experiment is shown.

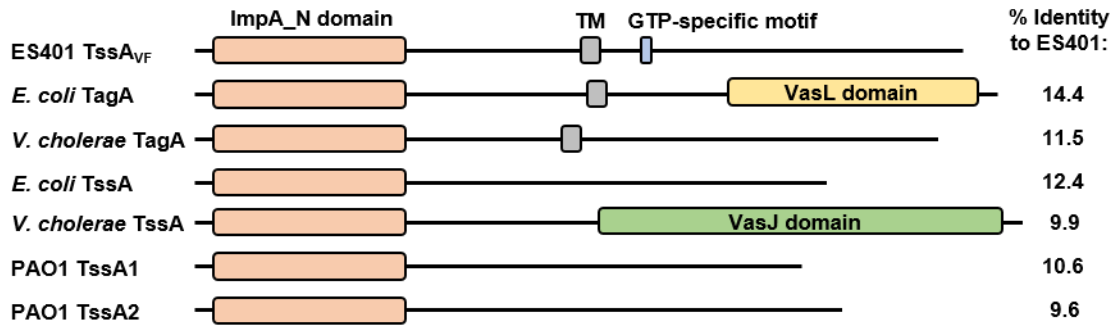

**Figure S2. The *Vibrio fischeri* ImpA\_N domain protein is distinct from TssA and TagA homologs.** Domain architecture for *V. fischeri* ES401 TssA<sub>VF</sub> and ImpA\_N domain proteins whose T6SS-related functions have been characterized in other species were identified using Hmmer. The GTP-binding motif (T/NKxD) was located by a manual sequence search and is only found in *V. fischeri* TssA<sub>VF</sub> and not found in homologs outside of the *V. fischeri* species. Percent identity to the ES401 protein was calculated by aligning the full-length proteins using Clustal Omega.

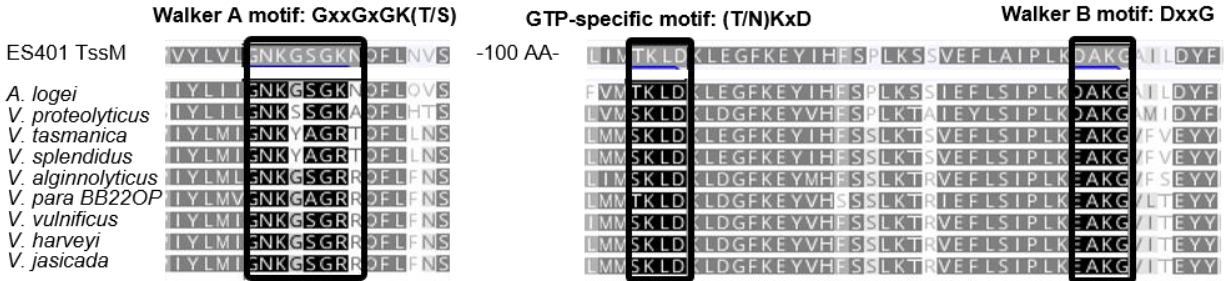

**Figure S3. The *V. fischeri* TssM protein contains predicted GTPase domains.** Walker A, Walker B, and GTP-specific binding motifs were identified by searching the ES401 TssM sequence manually. Analogous regions were identified by aligning the full-length sequences of ES401 TssM with closely-related vibrio homologs using Clustal Omega and visualized using Geneious. Black boxes outline motif regions and amino acid letter shading indicates conservation across species (black shading indicates a residue is 100% conserved).



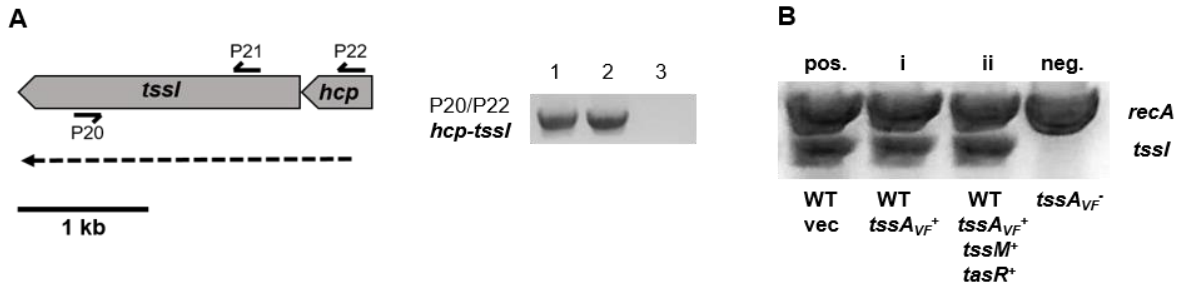

**Figure S4. Co-transcriptional analysis of wild-type ES401 T6SS2 genes.** (A) Graphic representation of *hcp* and *tssI* genes and the primers used for RT-PCR transcriptional analysis in wild-type ES401. The sequences for each primer can be found in Supplemental Table 5. Dashed arrows indicate predicted transcription based on RT-PCR results. Gel image depicting co-transcription of *hcp* and *tssI* in wild-type ES401 using primers P20 and P22. The lane assignments are as follows (1) wild-type ES401 chromosomal DNA as template; (2) wild-type ES401 RNA as template; (3) wild-type ES401 RNA as template, no reverse transcriptase. (B) Gel image based on RT-PCR results depicting relative abundance of *recA* and *tssI* transcripts in either wild-type ES401 carrying the empty vector (vec), a *tssA<sub>VF</sub>* expression vector, a *tssA<sub>VF</sub>-tssM-tasR* expression vector, or the *tssA<sub>VF</sub>* mutant as a negative control. RNA was extracted from each strain following a 5 h incubation on LBS agar plates supplemented with 1.0 mM IPTG, and extractions and subsequent transcriptional analysis was performed twice.

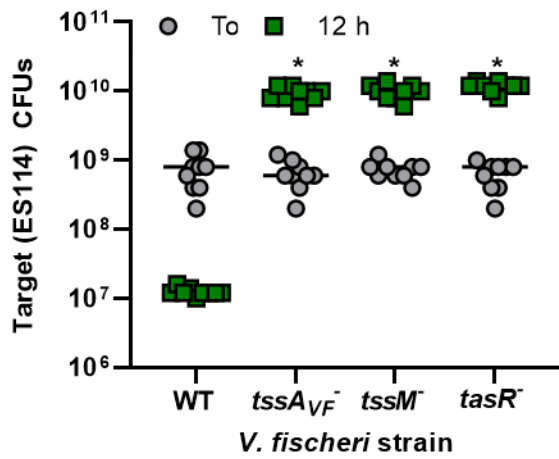

**Figure S5. Tn mutants remain non-lethal in high-viscosity media.** CFUs of ES114 at T0 (gray) or following a 12 h (green) coincubation with wild-type (WT) or mutant ES401 strains in a high-viscosity (hydrogel) liquid medium. \*, P<0.0001 by a 2-way ANOVA followed by a Sidak's multiple comparisons test comparing 12 h CFUs from coincubation with each mutant to coincubation with WT ES401. Experiment was performed 3 times and combined data are shown (n = 12).
